# Supplementary material for: Growth mode and strain effect on relaxor ferroelectric domains in epitaxial 0.67Pb(Mg1/3Nb2/3)O3–0.33PbTiO3/SrRuO3 heterostructures
Source: Royal Society of Chemistry journal article supplement (doi:10.1039/d0ra10107a), 2021-01-01
Supplement: d0ra10107a1.pdf [file d0ra10107a1.pdf]

## Growth mode and strain effect on relaxor ferroelectric domains in epitaxial 0.67Pb(Mg<sub>1/3</sub>Nb<sub>2/3</sub>)O<sub>3</sub>-0.33PbTiO<sub>3</sub>/SrRuO<sub>3</sub> heterostructures

Jamal Belhadi<sup>1</sup>, Urška Gabor<sup>1</sup>, Hana Uršič<sup>2</sup>, Nina Daneu<sup>1</sup>, Jieun Kim<sup>3</sup>, Zishen Tian<sup>3</sup>, Gertjan Koster<sup>1,4</sup>, Lane W. Martin<sup>3</sup>, and Matjaž Spreitzer<sup>1</sup>

(1)Advanced Materials Department, Jožef Stefan Institute, Jamova cesta 39, 1000, Ljubljana, Slovenia

(2)Electronic Ceramics Department, Jožef Stefan Institute, Jamova cesta 39, 1000, Ljubljana, Slovenia

(3)Department of Materials Science and Engineering, University of California, Berkeley, CA 94720, USA

(4)MESA+ Institute for Nanotechnology, University of Twente, 7500 AE Enschede, The Netherlands

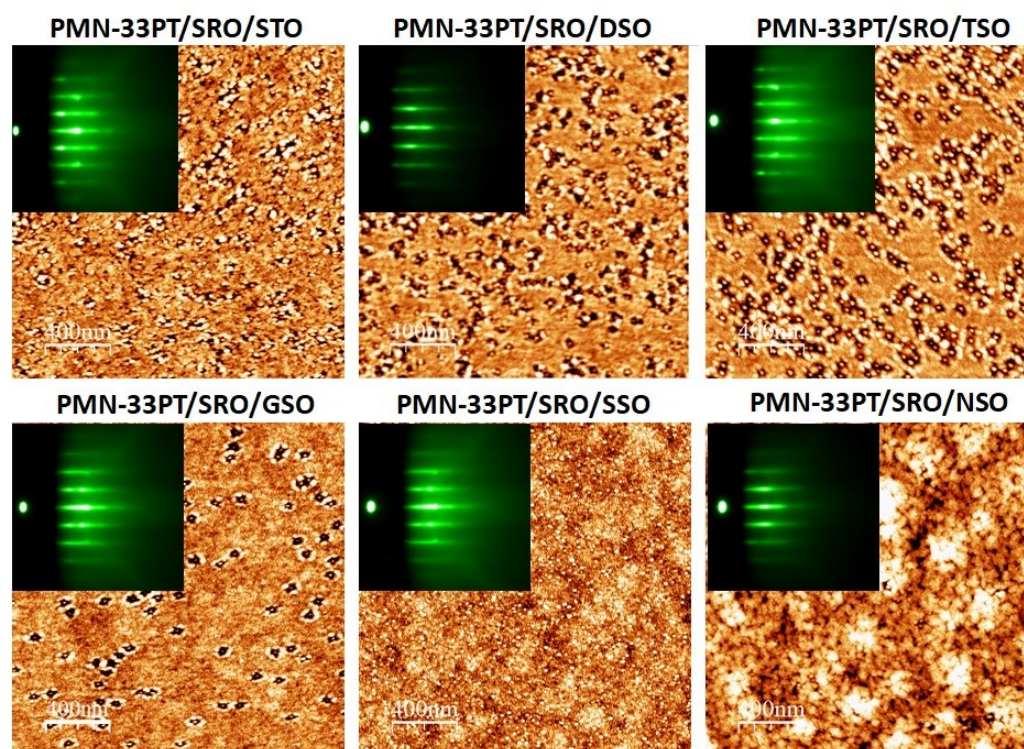

**FIG. S1.** AFM topography at room temperature of the surface of the as-grown PMN-33PT/SRO/STO and PMN-33PT/SRO/ReScO<sub>3</sub> (Re=DSO, TSO, GSO, SSO, and NSO) heterostructures. The insets show the corresponding RHEED pattern of the PMN-33PT layers.

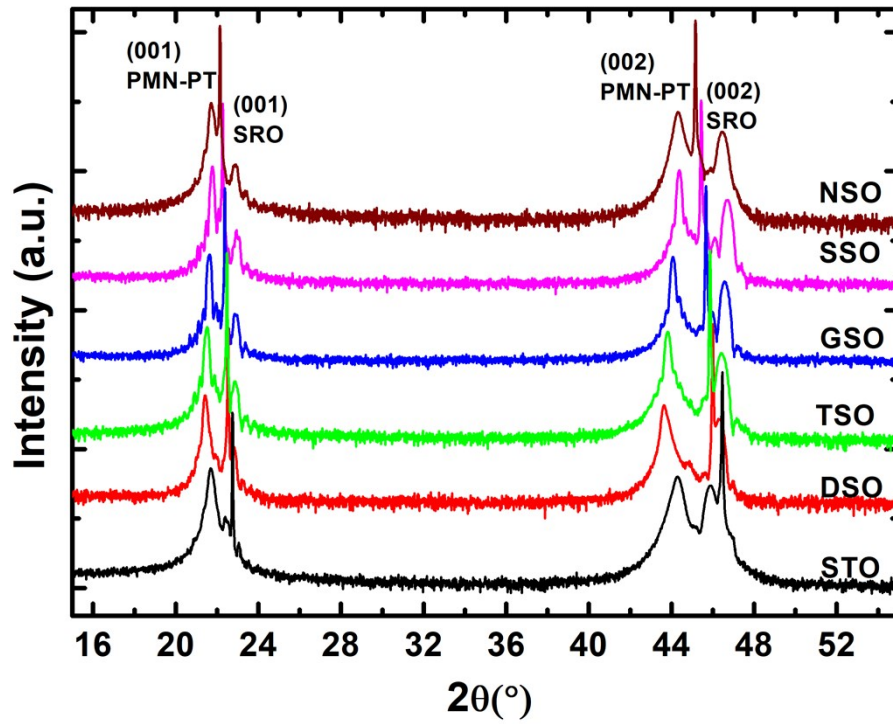

FIG. S2.  $\theta$ - $2\theta$  XRD patterns in the range  $15$ - $55^\circ$  of PMN-33PT/SRO/(STO and  $\text{ReScO}_3$ ) heterostructures showing single-phase and pyrochlore-free samples.

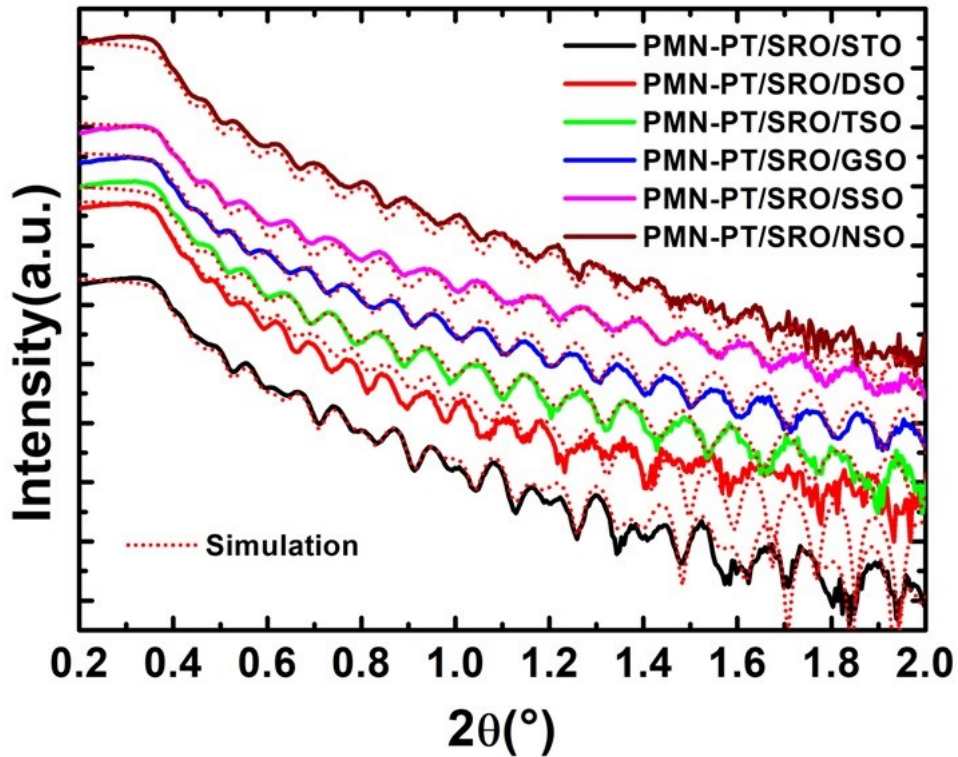

FIG. S3. X-ray reflectivity diagrams of PMN-33PT/SRO/(STO and  $\text{ReScO}_3$ ) heterostructures.

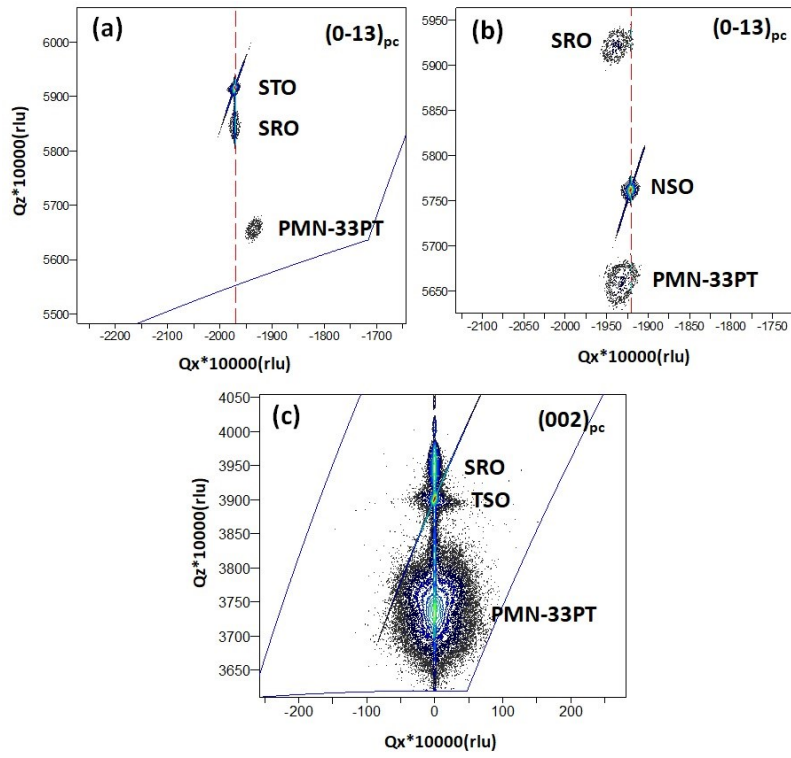

**FIG. S4.** RSMs of PMN-33PT/SRO/STO (a) and PMN-33PT/SRO/NSO (b) around  $(0-13)_{pc}$  and of PMN-33PT/SRO/TSO (c) around  $(002)_{pc}$ .
